# Supplementary material for: Forty-Three Loci Associated with Plasma Lipoprotein Size, Concentration, and Cholesterol Content in Genome-Wide Analysis
Source: PubMed Central journal article supplement (PMC2777390; doi:10.1371/journal.pgen.1000730), 2009-11-20
Supplement: pgen.1000730.s002.pdf [file pgen.1000730.s002.pdf]

Figure S2. Primary loci clustered hierarchically according to Cartesian distance corresponding to whether (=1) or not (=0) there were associations with each of the lipoprotein fractions in the model selection procedures (see Methods).
