# Supplementary material for: Forty-Three Loci Associated with Plasma Lipoprotein Size, Concentration, and Cholesterol Content in Genome-Wide Analysis
Source: PubMed Central journal article supplement (PMC2777390; doi:10.1371/journal.pgen.1000730), 2009-11-20

Figure S3. Dendrogram showing hierarchical relationships between loci clustered as in Figure S2.

## Loci, clustered by effects on lipoprotein fractions

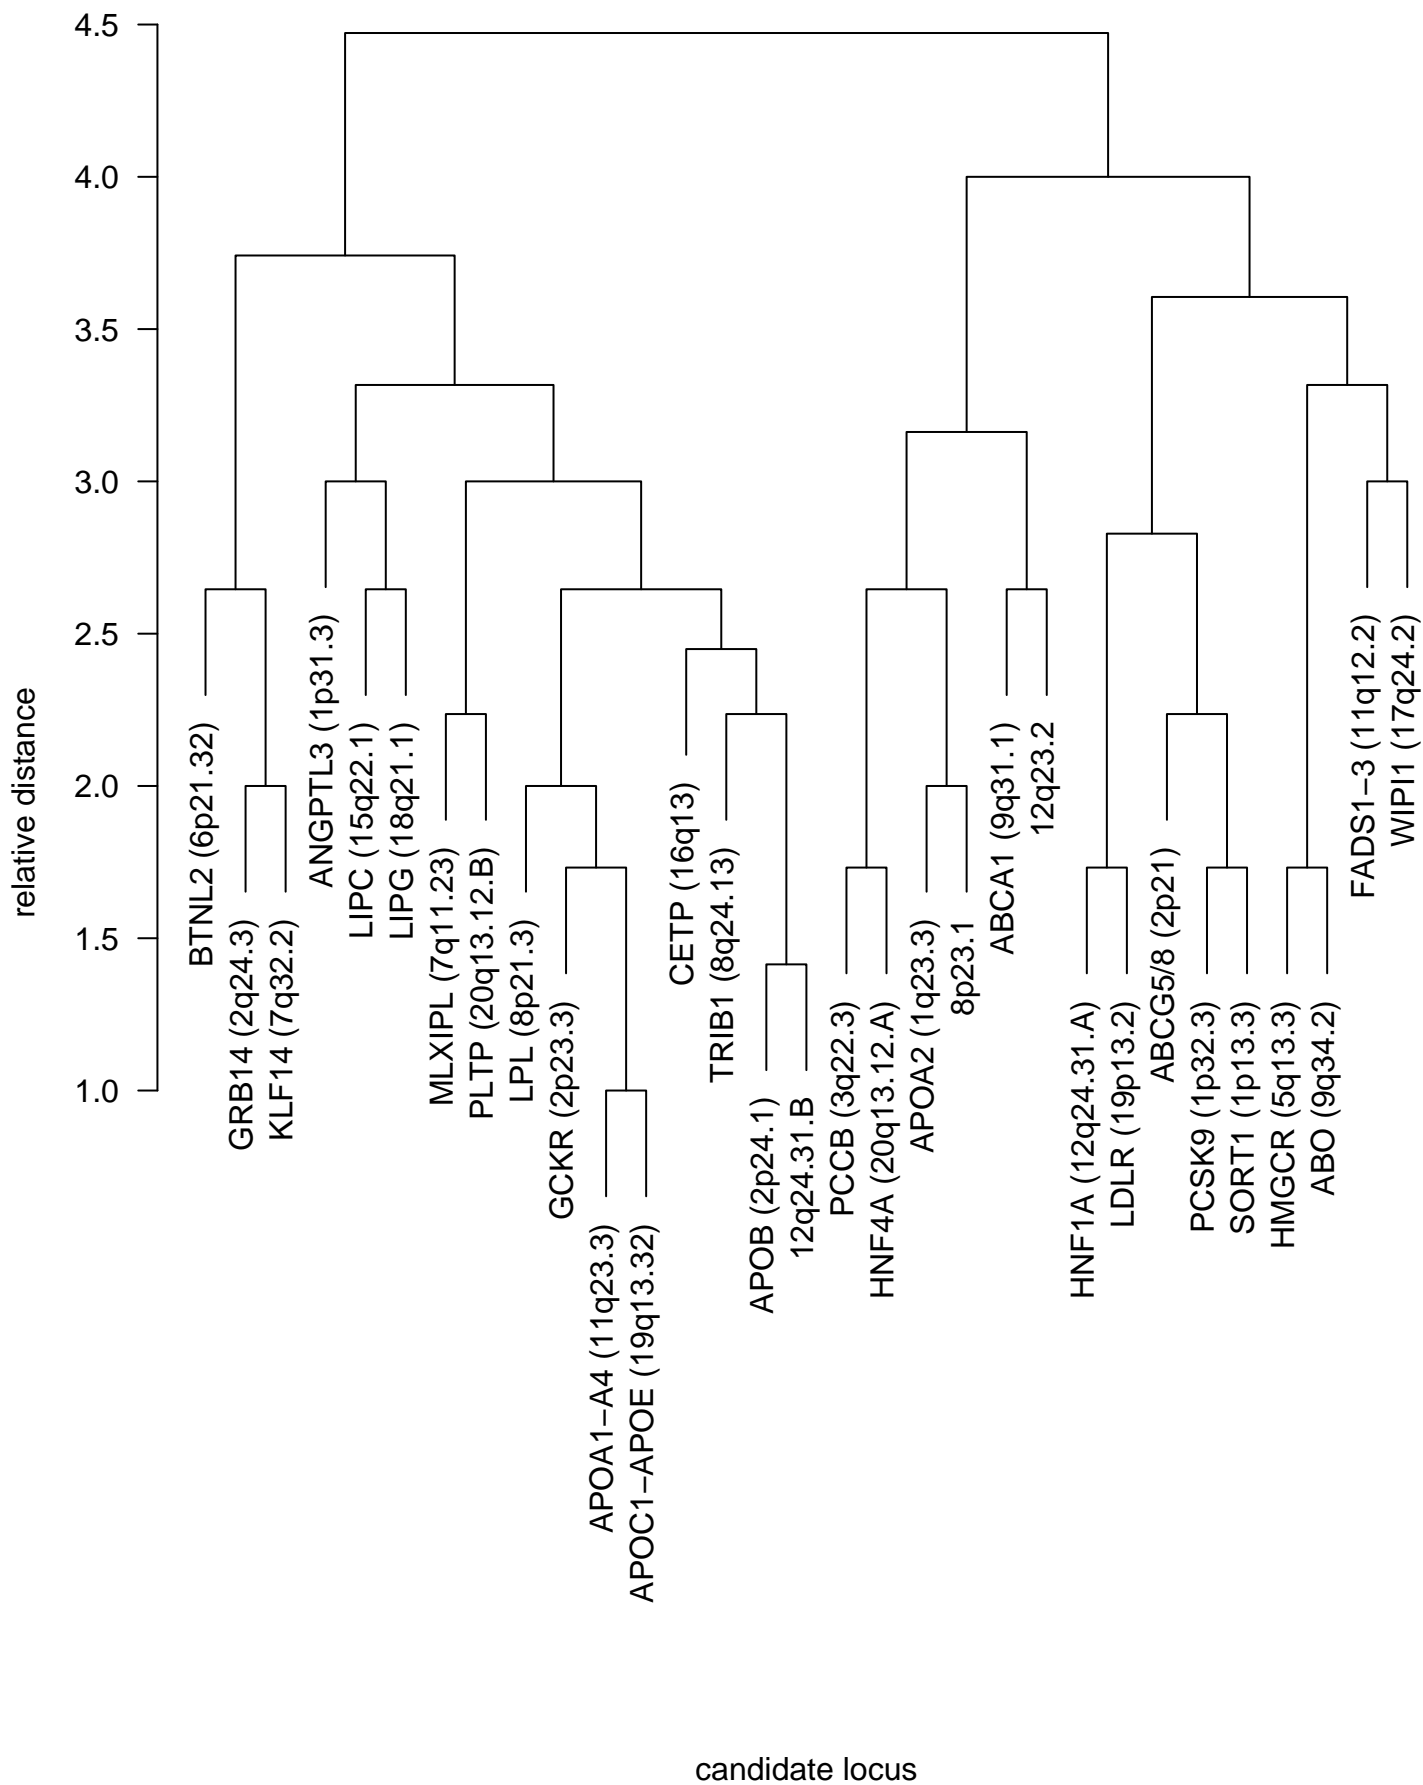

Supplement: pgen.1000730.s003.pdf [file pgen.1000730.s003.pdf]
